# Supplementary material for: tRFUniverse: A comprehensive resource for the interactive analyses of tRNA-derived ncRNAs in human cancer
Source: PubMed Central journal article supplement (PMC10831894; doi:10.1016/j.isci.2024.108810), 2024-01-05
Supplement: mmc1.pdf [file mmc1.pdf]

iScience, Volume 27

## **Supplemental information**

### **tRFUniverse: A comprehensive resource for the interactive analyses of tRNA-derived ncRNAs in human cancer**

**Alessandro La Ferlita, Salvatore Alaimo, Giovanni Nigita, Rosario Distefano, Joal D. Beane, Philip N. Tschlis, Alfredo Ferro, Carlo M. Croce, and Alfredo Pulvirenti**

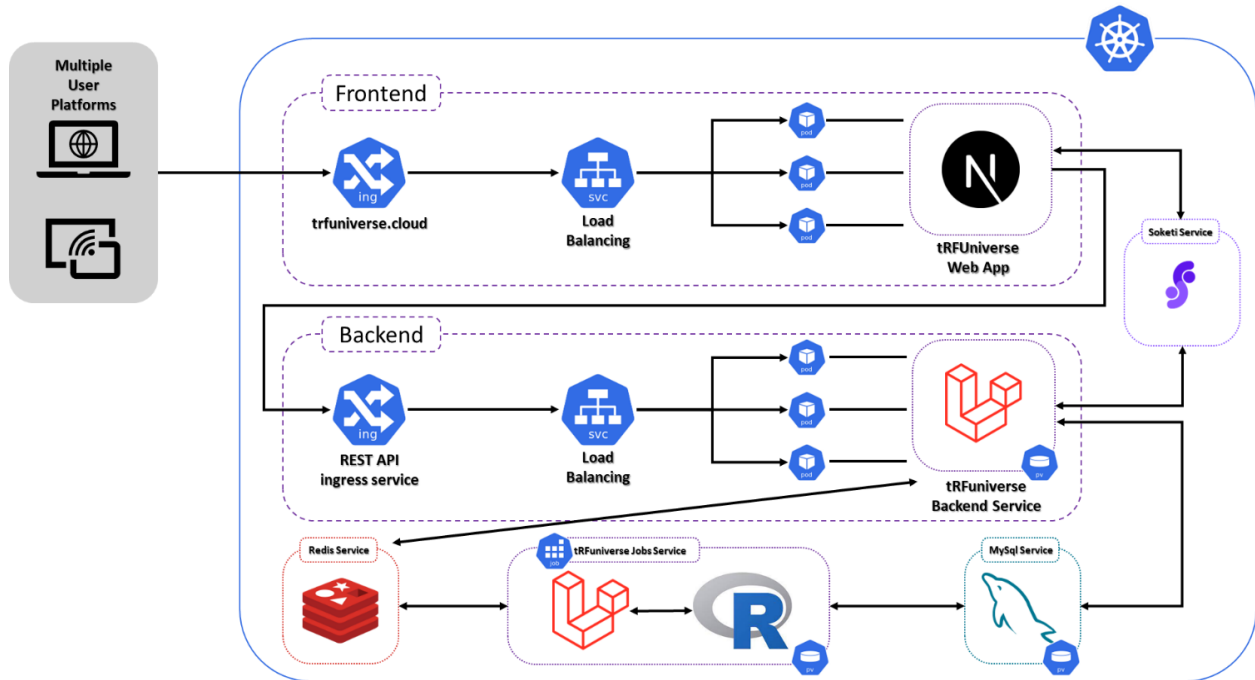

**Figure S1.** Database architecture of tRFUniverse, related to Figures 1 and 2.

Schematic representation of the frontend and backend architecture of tRFUniverse.

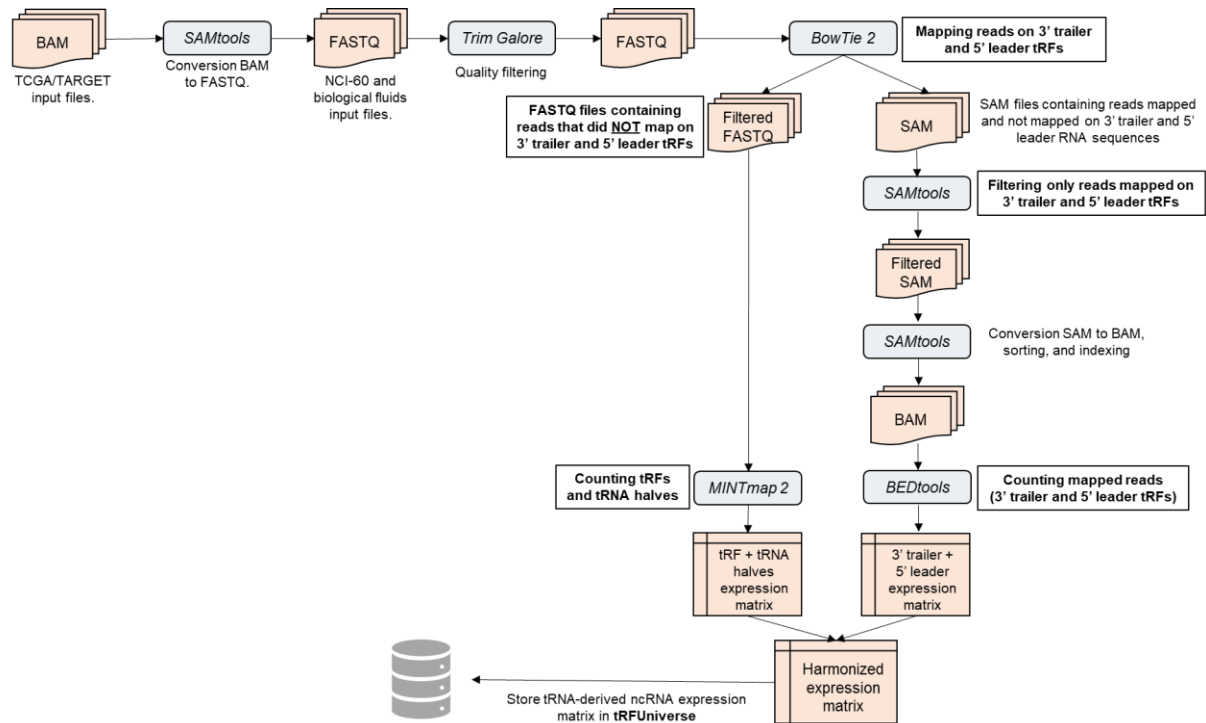

**Figure S2.** *tRNA-derived ncRNA pipeline for small RNA-Seq data*, related to Figures 1 and 3.

Schematic representation of the pipeline used for extracting the expression of tRNA-derived ncRNAs from the small RNA-Seq data of TCGA, TARGET, NCI-60, and human biological fluids.
